# Supplementary material for: Systematic investigation of Eu3+ activated Na2Ln4(MoO4)7 [Ln = La, Gd and Y] narrow band red emitting phosphors for hybrid white LEDs and plant growth
Source: Royal Society of Chemistry journal article supplement (doi:10.1039/d0nj03766d), 2020-01-01
Supplement: d0nj03766d1.pdf [file d0nj03766d1.pdf]

# Systematic investigation of $\text{Eu}^{3+}$ activated $\text{Na}_2\text{Ln}_4(\text{MoO}_4)_7$ [Ln = La, Gd and Y] narrow band red emitting phosphors for hybrid white LEDs and plant growth

Marikumar Rajendran and Sivakumar Vaidyanathan\*

Department of Chemistry, National Institute of Technology Rourkela, India.

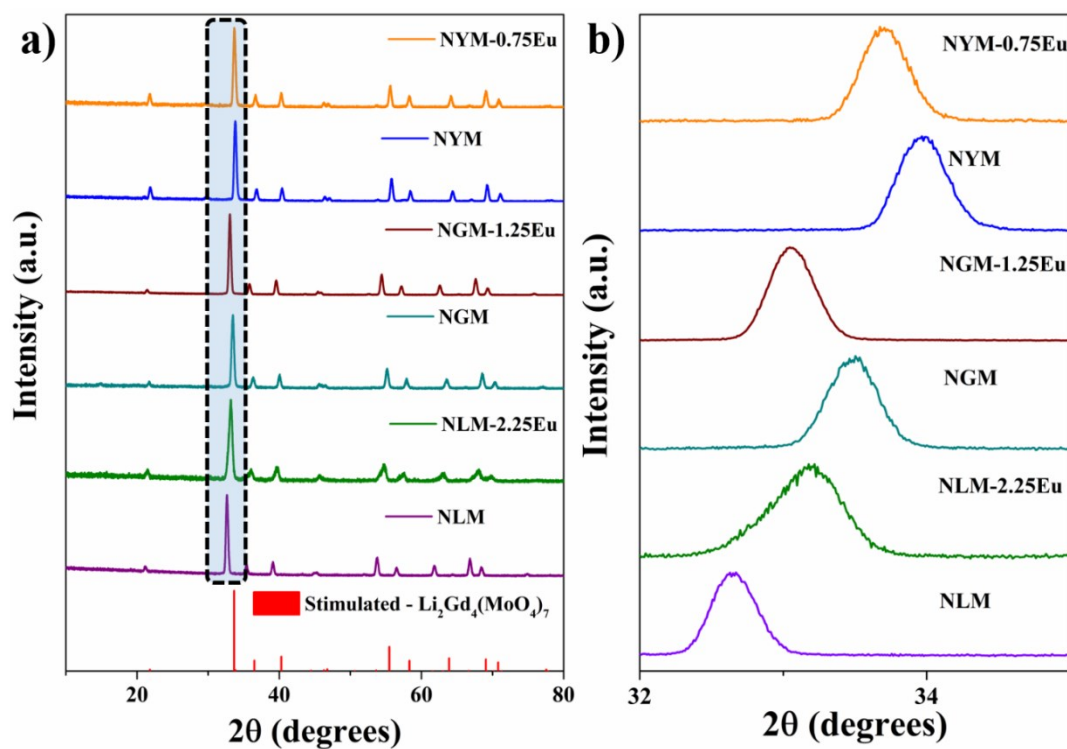

Fig. S1 a) PXRD pattern of the selected phosphor compositions, b) enlarged XRD pattern from 32-35°.

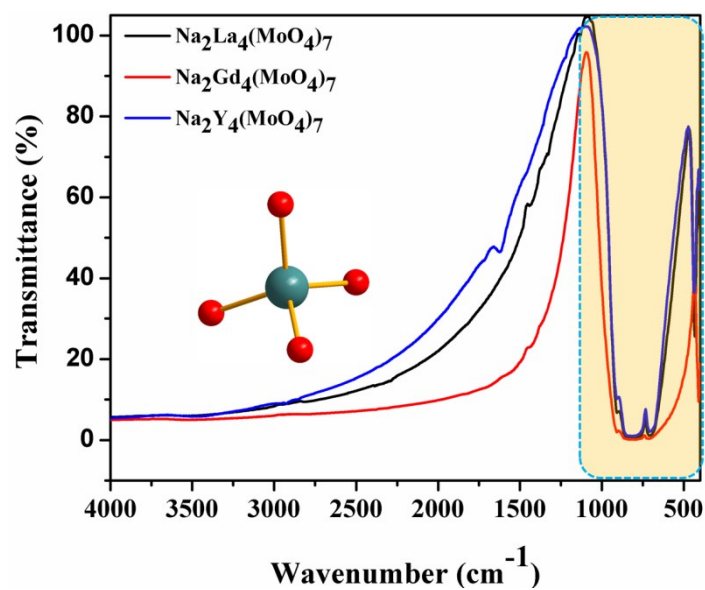

**Fig. S2** FT-IR spectrum of  $\text{Na}_2\text{Ln}_4(\text{MoO}_4)_7$  [Ln = La, Gd and Y] phosphor.

**Table ST2:**Judd – Ofelt Parameters of NGM:Eu<sup>3+</sup> phosphor.

| Concentration<br>of Eu <sup>3+</sup> | Judd – Ofelt Parameters              |                                      |                              |                              |                              |
|--------------------------------------|--------------------------------------|--------------------------------------|------------------------------|------------------------------|------------------------------|
|                                      | $\Omega_2$                           | $\Omega_4$                           | $A_{0-1}$ in S <sup>-1</sup> | $A_{0-2}$ in S <sup>-1</sup> | $A_{0-4}$ in S <sup>-1</sup> |
|                                      | (10 <sup>-19</sup> cm <sup>2</sup> ) | (10 <sup>-20</sup> cm <sup>2</sup> ) |                              |                              |                              |
| 0.25                                 | 1.1701                               | 3.9248                               | 50                           | 959.4635                     | 156.2807                     |
| 0.5                                  | 1.2072                               | 3.4890                               | 50                           | 989.8101                     | 138.9291                     |
| 0.75                                 | 1.2228                               | 4.3589                               | 50                           | 1002.661                     | 173.5618                     |
| 1                                    | 1.2499                               | 4.5698                               | 50                           | 1024.8141                    | 181.9631                     |
| 1.25                                 | 1.2807                               | 4.9196                               | 50                           | 1050.1093                    | 195.8900                     |
| 1.5                                  | 1.2469                               | 2.6851                               | 50                           | 1022.3967                    | 106.9170                     |
| 1.75                                 | 1.2278                               | 4.5046                               | 50                           | 1006.7118                    | 179.3664                     |
| 2                                    | 1.2134                               | 4.8061                               | 50                           | 994.9432                     | 191.3713                     |

**Table ST3:**Judd – Ofelt Parameters of NYM:Eu<sup>3+</sup> phosphor.

| Concentration<br>of Eu <sup>3+</sup> | Judd – Ofelt Parameters              |                                      |                              |                              |                              |
|--------------------------------------|--------------------------------------|--------------------------------------|------------------------------|------------------------------|------------------------------|
|                                      | $\Omega_2$                           | $\Omega_4$                           | $A_{0-1}$ in S <sup>-1</sup> | $A_{0-2}$ in S <sup>-1</sup> | $A_{0-4}$ in S <sup>-1</sup> |
|                                      | (10 <sup>-19</sup> cm <sup>2</sup> ) | (10 <sup>-20</sup> cm <sup>2</sup> ) |                              |                              |                              |
| 0.25                                 | 1.2039                               | 4.6579                               | 50                           | 987.0965                     | 185.4697                     |
| 0.5                                  | 1.2246                               | 4.3001                               | 50                           | 1004.0930                    | 171.2253                     |
| 0.75                                 | 1.343                                | 5.0691                               | 50                           | 1101.1524                    | 201.8425                     |
| 1                                    | 1.2951                               | 5.4590                               | 50                           | 1061.8900                    | 217.3692                     |
| 1.25                                 | 1.2531                               | 5.3527                               | 50                           | 1027.4406                    | 213.1382                     |
| 1.5                                  | 1.2308                               | 4.7206                               | 50                           | 1009.1523                    | 187.9660                     |
| 1.75                                 | 1.2205                               | 5.1091                               | 50                           | 1000.7743                    | 203.4388                     |
| 2                                    | 1.1997                               | 4.6820                               | 50                           | 983.6950                     | 186.4295                     |

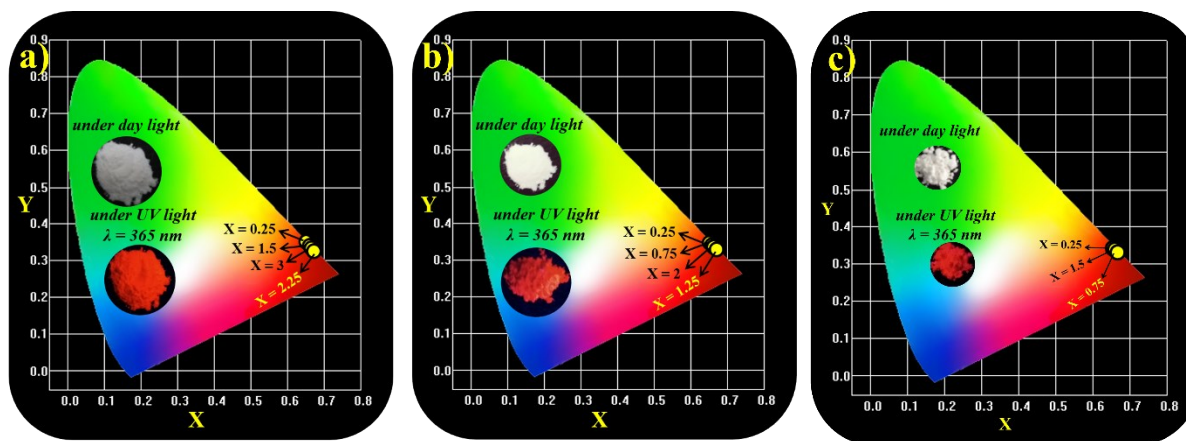

**Fig. S3** CIE of Eu<sup>3+</sup> activated Na<sub>2</sub>Ln<sub>4</sub>(MoO<sub>4</sub>)<sub>7</sub> [Ln = a) La, b) Gd and c) Y] red phosphors.

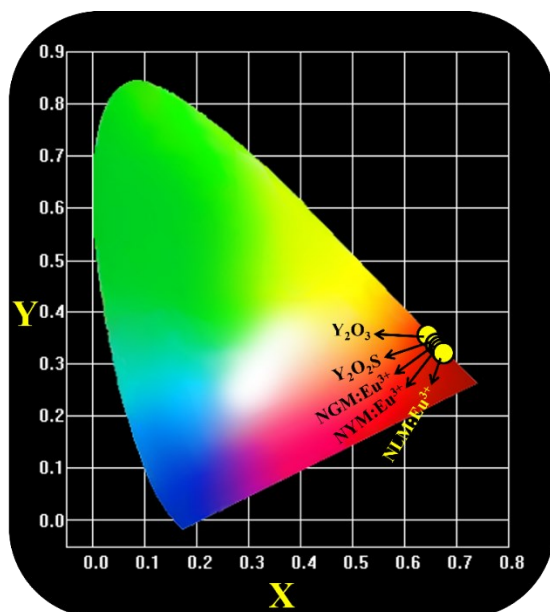

**Fig. S4** Comparative CIE of  $Eu^{3+}$  activated  $Na_2Ln_4(MoO_4)_7$  red phosphor with commercial phosphor.

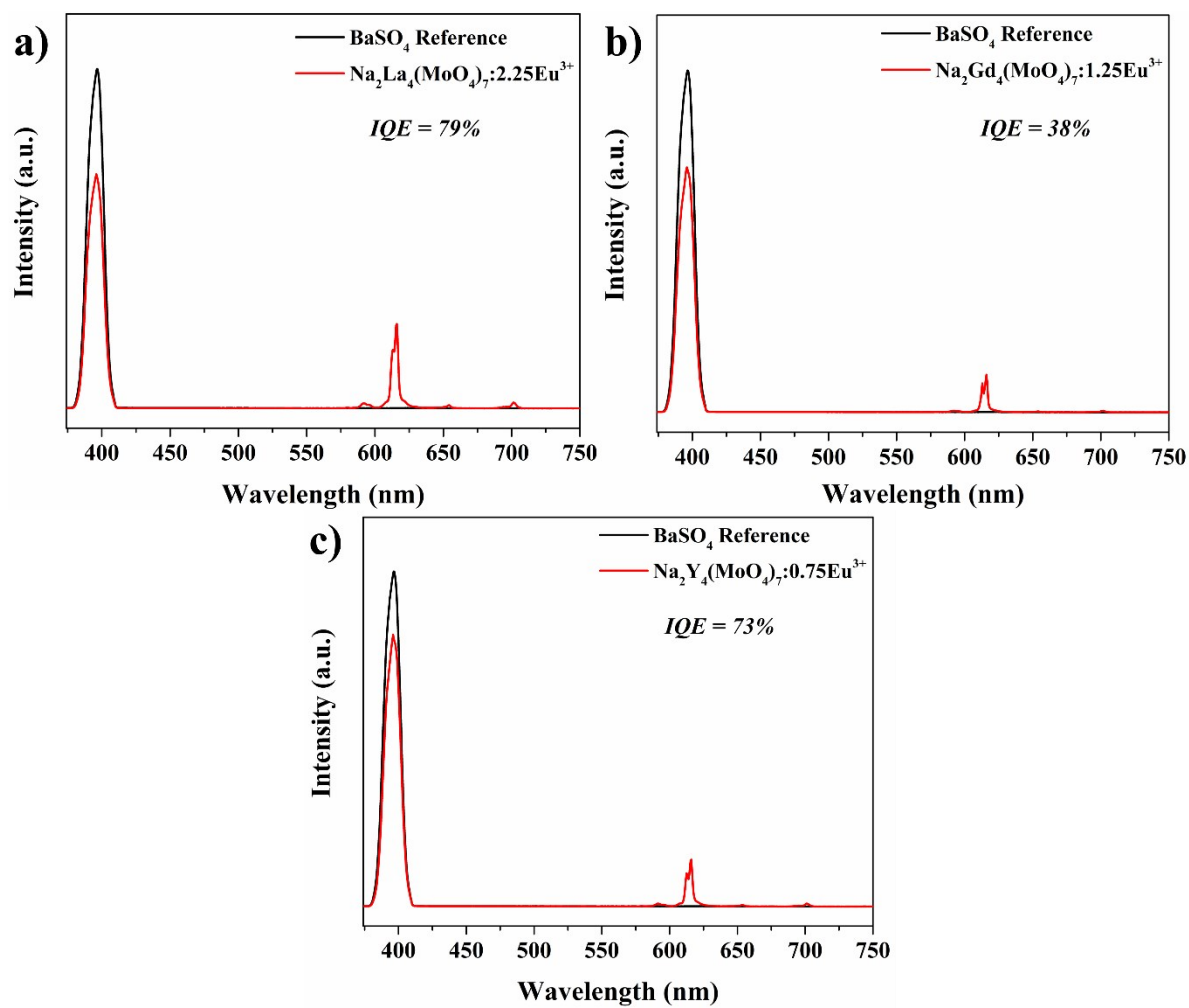

**Fig. S5** Internal quantum efficiency of  $\text{Eu}^{3+}$  activated  $\text{Na}_2\text{Ln}_4(\text{MoO}_4)_7$  [Ln = a) La, b) Gd and c) Y] red phosphors.

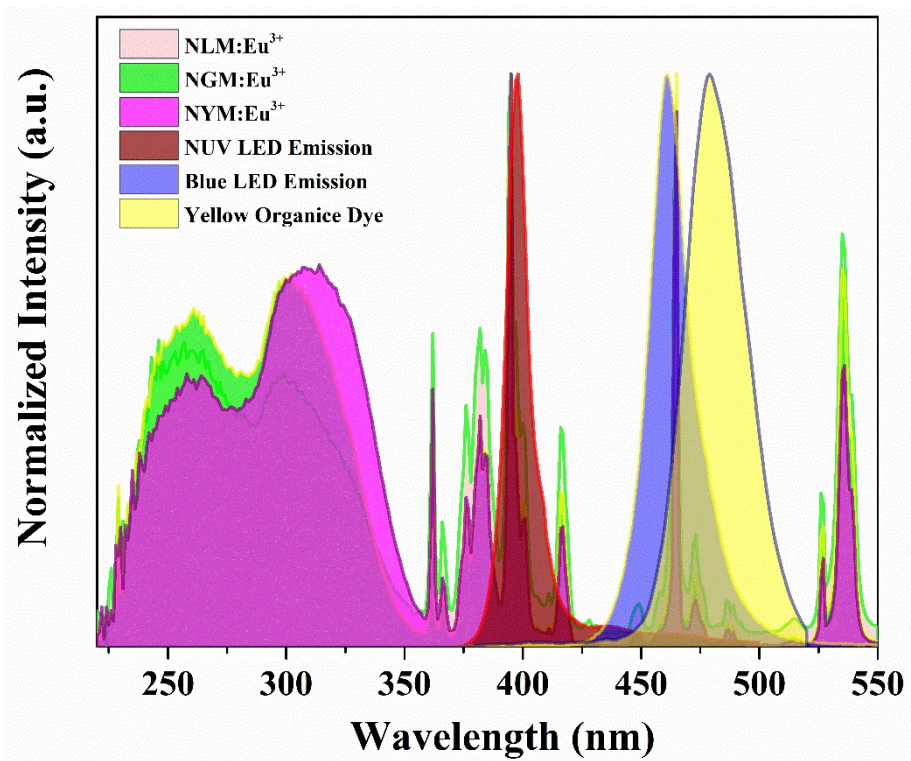

**Fig. S6** Excitation of  $\text{Eu}^{3+}$  activated  $\text{Na}_2\text{Ln}_4(\text{MoO}_4)_7$  [ $\text{Ln} = \text{La}, \text{Gd}$  and  $\text{Y}$ ] red phosphors, yellow organic dye and emission of nUV-LED and blue LED.
